# Supplementary material for: Early prolonged ambulatory cardiac monitoring in stroke (EPACS): an open-label randomised controlled trial
Source: Eur J Med Res. 2019 Jul 26;24:25. doi: 10.1186/s40001-019-0383-8 (PMC6659210; doi:10.1186/s40001-019-0383-8)
Supplement: Supplementary file 1 — Additional file 1. Probability and cost assumptions for economic model [file 40001_2019_383_MOESM1_ESM.pdf]

Clinical inputs

Event inputs

Select Hospital:

King's College Hospital NHS Foundation Trust

|                                                                           | Default value                   | Enter alternate values below | Source of default value                            |
|---------------------------------------------------------------------------|---------------------------------|------------------------------|----------------------------------------------------|
|                                                                           |                                 | ↓                            |                                                    |
| Ischaemic strokes - % of all strokes                                      | 87.1%                           | 87.1%                        | SSNAP [1]                                          |
| % of ischaemic strokes requiring outpatient monitoring                    | 23.5%                           | 23.5%                        | Putala et al [2]                                   |
| % of TIA/ outpatient treated stroke requiring outpatient monitoring       | 32.2%                           | 32.2%                        | Amarenco et al [3]                                 |
| % monitored as outpatients (any technology)                               | 90.0%                           | 90.0%                        | Assumption                                         |
| Monitoring strategy (first and second pass)                               | 1st: Holter; 2nd: repeat Holter |                              |                                                    |
| % patients discharged after negative first pass monitoring                | 70.0%                           | 70.0%                        | Assumption                                         |
| % of patients receiving implantable loop after negative first/second pass | 2.0%                            | 2.0%                         | Assumption                                         |
| % of patients receiving implantable loop after negative Zio               | 0.4%                            | 0.4%                         | 80% reduction based on user feedback               |
| Detection rates                                                           |                                 |                              |                                                    |
| % AF (True prevalence in target group)                                    | 30.0%                           | 30.0%                        | Sanna et al [4]                                    |
| % AF (Holter - first pass)                                                | 2.0%                            | 2.0%                         | Teo [5]                                            |
| % AF (Holter - second pass)                                               | 2.0%                            | 2.0%                         | Assumption - same as first pass                    |
| % AF (5-7 day ELR - first pass)                                           | 5.7%                            | 5.7%                         | Assumption: Same as second pass detection rate [6] |
| % AF (5-7 day ELR - second pass)                                          | 5.7%                            | 5.7%                         | Jabaudon et al [6]                                 |
| % AF (Zio)                                                                | 16.0%                           | 16.0%                        | Teo [5]                                            |
| % AF (implantable monitor)                                                | 19.3%                           | 19.3%                        | Weighted mean from literature (Albers et al [7])   |
| % AF detected on chosen strategy                                          | 2.7%                            |                              | Calculated                                         |
| % AF detected on Zio strategy                                             | 16.1%                           |                              | Calculated                                         |
| Recurrent stroke in year 1 (untreated AF)                                 | 12.0%                           | 12.0%                        | Hart et al [8]                                     |
| Recurrent stroke in year 1 (anticoagulated AF)                            | 4.3%                            | 4.3%                         | Hart et al [8]                                     |

Event outputs

Basis of analysis

Stroke + TIA

|                                                                                 | Selected trust |                        |
|---------------------------------------------------------------------------------|----------------|------------------------|
| Number of in-patient strokes                                                    | 1,585          | HES [9]                |
| Number of definite or probable TIA + outpatient-managed strokes                 | 2,262          | Giles & Rothwell [10]. |
| Target patients                                                                 | 1,053          |                        |
| Recurrent strokes attributable to AF in target patients                         | 37.9           |                        |
| Maximum preventable strokes if all patients identified and anticoagulation used | 24.3           |                        |
| Strokes prevented using current strategy                                        | 2.2            |                        |
| Strokes prevented using Zio                                                     | 13.0           |                        |
| Incremental strokes avoided using Zio vs Holter                                 | 10.8           |                        |

## Cost inputs and results (Medical costs only + 1 year cost horizon)

### Cost inputs

Select cost horizon

Select cost basis

|                                         | Default value | Enter alternate values below | Source of default value  |
|-----------------------------------------|---------------|------------------------------|--------------------------|
|                                         |               | ↓                            |                          |
| 1 year medical cost of stroke           | £13,452       | £13,452                      | Xu et al [11]            |
| 1 year total cost of stroke             | £22,429       | £22,429                      | Xu et al [11]            |
| Cost of conventional testing (per pass) | £133.43       | £133.43                      | NHS Reference Costs [12] |
| Cost of Zio                             | £295          | £295                         | Manufacturer             |
| Cost of implantable monitor             | £3,583        | £3,583                       | HES [9]                  |

### Cost outputs

|                                                     | <i>Selected trust</i> |
|-----------------------------------------------------|-----------------------|
| Cost of AF-attributable strokes in target group     | £509,770              |
| Savings based on use of current monitoring strategy | £29,455               |
| Savings based on use of Zio strategy                | £175,162              |
| Cost of current testing in target group             | £181,749              |
| Cost of implantable monitor in target group         | £22,177               |
| Cost of Zio testing in target group                 | £279,479              |
| Cost of ILR in Zio group                            | £12,673               |
| Cost net of testing (current strategy + ILR)        | £684,241              |
| Cost net of testing (Zio + ILR)                     | £626,760              |
| <b>Comparison of Zio vs Current strategy</b>        |                       |
| Incremental cost                                    | -£57,481              |
| Incremental strokes prevented                       | 10.8                  |

### Additional analysis of Out-patient opportunity costs

|                                                             |     |     |                    |
|-------------------------------------------------------------|-----|-----|--------------------|
| % conventionally monitored patients attending follow-up OPD | 80% | 80% | Assumption         |
| % Zio monitored patients attending follow-up OPD            | 40% | 40% | Assumption         |
| Cost of follow-up OPD appointment                           | £79 | £79 | NHS Tariff 2017-18 |

|                                                        | <i>Selected trust</i> |
|--------------------------------------------------------|-----------------------|
| Number of out-patient follow-ups for selected strategy | 1,090                 |
| Number of OPD follow-ups with Zio                      | 379                   |
| Appointment saving Zio vs current strategy             | 711                   |
| Incremental cost Zio vs current strategy               | -£56,149              |
| <b>Overall incremental cost using Zio</b>              | <b>-£113,630</b>      |

Incremental cost per stroke prevented:

**Dominant**

The analysis shows that for King's College Hospital NHS Foundation Trust the use of the Zio patch is associated with total savings of £113,630 in year 1. This means that the Zio patch has a better outcome than the current strategy at a lower overall cost

## Cost inputs and results (Medical costs only + 5 year cost horizon)

### Cost inputs

Select cost horizon

5 year

Select cost basis

Medical costs

| Default value                           | Enter alternate values below | Source of default value  |
|-----------------------------------------|------------------------------|--------------------------|
|                                         | ↓                            |                          |
| 5 year medical cost of stroke           | £17,963                      | Xu et al [11]            |
| 5 year total cost of stroke             | £46,039                      | Xu et al [11]            |
| Cost of conventional testing (per pass) | £133.43                      | NHS Reference Costs [12] |
| Cost of Zio                             | £295                         | Manufacturer             |
| Cost of implantable monitor             | £3,583                       | HES [9]                  |

### Cost outputs

|                                                     | <i>Selected trust</i> |
|-----------------------------------------------------|-----------------------|
| Cost of AF-attributable strokes in target group     | £680,716              |
| Savings based on use of current monitoring strategy | £39,333               |
| Savings based on use of Zio strategy                | £233,900              |
| Cost of current testing in target group             | £181,749              |
| Cost of implantable monitor in target group         | £22,177               |
| Cost of Zio testing in target group                 | £279,479              |
| Cost of ILR in Zio group                            | £12,673               |
| Cost net of testing (current strategy + ILR)        | £845,309              |
| Cost net of testing (Zio + ILR)                     | £738,967              |
| <b>Comparison of Zio vs Current strategy</b>        |                       |
| Incremental cost                                    | -£106,342             |
| Incremental strokes prevented                       | 10.8                  |

### Additional analysis of Out-patient opportunity costs

|                                                             |     |     |                    |
|-------------------------------------------------------------|-----|-----|--------------------|
| % conventionally monitored patients attending follow-up OPD | 80% | 80% | Assumption         |
| % Zio monitored patients attending follow-up OPD            | 40% | 40% | Assumption         |
| Cost of follow-up OPD appointment                           | £79 | £79 | NHS Tariff 2017-18 |

|                                                        | <i>Selected trust</i> |
|--------------------------------------------------------|-----------------------|
| Number of out-patient follow-ups for selected strategy | 1,090                 |
| Number of OPD follow-ups with Zio                      | 379                   |
| Appointment saving Zio vs current strategy             | 711                   |
| Incremental cost Zio vs current strategy               | -£56,149              |
| <b>Overall incremental cost using Zio</b>              | <b>-£162,491</b>      |

Incremental cost per stroke prevented:

**Dominant**

The analysis shows that for King's College Hospital NHS Foundation Trust the use of the Zio patch is associated with total savings of £162,491 over 5 years. This means that the Zio patch has a better outcome than the current strategy at a lower overall cost

## Cost inputs and results (Medical & Social Care costs + 1 year cost horizon)

### Cost inputs

Select cost horizon

1 year

Select cost basis

Medical + Social Care costs

|                                         | Default value | Enter alternate values below | Source of default value  |
|-----------------------------------------|---------------|------------------------------|--------------------------|
|                                         |               | ↓                            |                          |
| 1 year medical cost of stroke           | £13,452       | £13,452                      | Xu et al [11]            |
| 1 year total cost of stroke             | £22,429       | £22,429                      | Xu et al [11]            |
| Cost of conventional testing (per pass) | £133.43       | £133.43                      | NHS Reference Costs [12] |
| Cost of Zio                             | £295          | £295                         | Manufacturer             |
| Cost of implantable monitor             | £3,583        | £3,583                       | HES [9]                  |

### Cost outputs

|                                                     | <i>Selected trust</i> |
|-----------------------------------------------------|-----------------------|
| Cost of AF-attributable strokes in target group     | £849,957              |
| Savings based on use of current monitoring strategy | £49,112               |
| Savings based on use of Zio strategy                | £292,053              |
| Cost of current testing in target group             | £181,749              |
| Cost of implantable monitor in target group         | £22,177               |
| Cost of Zio testing in target group                 | £279,479              |
| Cost of ILR in Zio group                            | £12,673               |
| Cost net of testing (current strategy + ILR)        | £1,004,772            |
| Cost net of testing (Zio + ILR)                     | £850,056              |
| <b>Comparison of Zio vs Current strategy</b>        |                       |
| Incremental cost                                    | -£154,716             |
| Incremental strokes prevented                       | 10.8                  |

### Additional analysis of Out-patient opportunity costs

|                                                             |     |     |                    |
|-------------------------------------------------------------|-----|-----|--------------------|
| % conventionally monitored patients attending follow-up OPD | 80% | 80% | Assumption         |
| % Zio monitored patients attending follow-up OPD            | 40% | 40% | Assumption         |
| Cost of follow-up OPD appointment                           | £79 | £79 | NHS Tariff 2017-18 |

|                                                        | <i>Selected trust</i> |
|--------------------------------------------------------|-----------------------|
| Number of out-patient follow-ups for selected strategy | 1,090                 |
| Number of OPD follow-ups with Zio                      | 379                   |
| Appointment saving Zio vs current strategy             | 711                   |
| Incremental cost Zio vs current strategy               | -£56,149              |

**Overall incremental cost using Zio** -£210,865

**Incremental cost per stroke prevented:**

**Dominant**

The analysis shows that for King's College Hospital NHS Foundation Trust the use of the Zio patch is associated with total savings of £210,865 in year 1. This means that the Zio patch has a better outcome than the current strategy at a lower overall cost

## Cost inputs and results (Medical & Social Care costs + 5 year cost horizon)

### Cost inputs

Select cost horizon

Select cost basis

| Default value                           | Enter alternate values below | Source of default value  |
|-----------------------------------------|------------------------------|--------------------------|
|                                         | ↓                            |                          |
| 5 year medical cost of stroke           | £17,963                      | Xu et al [11]            |
| 5 year total cost of stroke             | £46,039                      | Xu et al [11]            |
| Cost of conventional testing (per pass) | £133.43                      | NHS Reference Costs [12] |
| Cost of Zio                             | £295                         | Manufacturer             |
| Cost of implantable monitor             | £3,583                       | HES [9]                  |

### Cost outputs

|                                                     | <i>Selected trust</i> |
|-----------------------------------------------------|-----------------------|
| Cost of AF-attributable strokes in target group     | £1,744,669            |
| Savings based on use of current monitoring strategy | £100,810              |
| Savings based on use of Zio strategy                | £599,484              |
| Cost of current testing in target group             | £181,749              |
| Cost of implantable monitor in target group         | £22,177               |
| Cost of Zio testing in target group                 | £279,479              |
| Cost of ILR in Zio group                            | £12,673               |
| Cost net of testing (current strategy + ILR)        | £1,847,785            |
| Cost net of testing (Zio + ILR)                     | £1,437,336            |
| <b>Comparison of Zio vs Current strategy</b>        |                       |
| Incremental cost                                    | -£410,449             |
| Incremental strokes prevented                       | 10.8                  |

### Additional analysis of Out-patient opportunity costs

|                                                             |     |     |                    |
|-------------------------------------------------------------|-----|-----|--------------------|
| % conventionally monitored patients attending follow-up OPD | 80% | 80% | Assumption         |
| % Zio monitored patients attending follow-up OPD            | 40% | 40% | Assumption         |
| Cost of follow-up OPD appointment                           | £79 | £79 | NHS Tariff 2017-18 |

|                                                        | <i>Selected trust</i> |
|--------------------------------------------------------|-----------------------|
| Number of out-patient follow-ups for selected strategy | 1,090                 |
| Number of OPD follow-ups with Zio                      | 379                   |
| Appointment saving Zio vs current strategy             | 711                   |
| Incremental cost Zio vs current strategy               | -£56,149              |
| <b>Overall incremental cost using Zio</b>              | <b>-£466,598</b>      |

Incremental cost per stroke prevented:

**Dominant**

The analysis shows that for King's College Hospital NHS Foundation Trust the use of the Zio patch is associated with total savings of £466,598 over 5 years. This means that the Zio patch has a better outcome than the current strategy at a lower overall cost

## References

1. Stroke Sentinel National Audit Programme (SSNAP). National results (Clinical) April 2016-March 2017. Available at: <https://www.strokeaudit.org/results/Clinical-audit/National-Results.aspx>
2. Putaala J et al. Undetermined stroke with an embolic pattern. A common phenotype with high early recurrence risk. *Ann Med* 2015;47:406-13
3. Amarenco P et al. One-year risk of stroke after transient ischaemic attack or minor stroke. *N Engl J Med* 2016;374:1533-42
4. Sanna T et al. Cryptogenic stroke and underlying atrial fibrillation. *N Engl J Med* 2014;370:2478-86
5. Teo J. Early prolonged ambulatory cardiac monitoring in stroke (EPACS) - open label randomised clinical trial. Presented at: 3rd European Stroke Conference. Prague 16-18 May 2017
6. Jabaudon D et al. Usefulness of ambulatory 7-day ECG monitoring for the detection of atrial fibrillation and flutter after acute stroke and transient ischaemic attack. *Stroke* 2004;35:1647-51.
7. Albers G et al. Heart rhythm monitoring strategies for cryptogenic stroke: 2015 diagnostics and monitoring stroke focus group report. *J Am Heart Assoc* 2016;5:e002944
8. Hart R et al. Meta-analysis: antithrombotic therapy to prevent stroke in patients who have nonvalvular atrial fibrillation. *Ann Intern med* 2007;146:857-67.
9. Harvey-Walsh. Bespoke analysis of Hospital Episode Statistics for England (Oct 2016-Sept 2017)
10. Giles M, Rothwell P. Substantial underestimation of the need for outpatient services for TIA and minor stroke. *Age Ageing* 2007;36:676-80.
11. Xu X-M et al. The economic burden of stroke care in England, Wales and Northern Ireland: Using a national stroke register to estimate and report patient-level health economic outcomes in stroke. *Eur Stroke J* 2018;3:82-91
12. NHS Improvement. NHS Reference Costs 2016-17. Available at: <https://improvement.nhs.uk/documents/1973/2 - National schedule of reference costs - the main schedule.xlsx>
